# Supplementary material
Source: PubMed Central journal article supplement (PMC4167528)
Supplement: mmc1.pdf [file mmc1.pdf]

# **An Engineered Membrane to Measure Electroporation: Effect of Tethers and Bioelectronic Interface**

William Hoiles,<sup>1</sup> Vikram Krishnamurthy,<sup>1,\*</sup> Charles G. Cranfield,<sup>2,3</sup> and Bruce Cornell<sup>4</sup>

<sup>1</sup>Department of Electrical and Computer Engineering, University of British Columbia, Vancouver, British Columbia, Canada; <sup>2</sup>School of Medical and Molecular Biosciences, University of Technology Sydney, Broadway, New South Wales, Australia; <sup>3</sup>Victor Chang Cardiac Research Institute, Darlinghurst, New South Wales, Australia; and <sup>4</sup>Surgical Diagnostics, Roseville, New South Wales, Australia

**TABLE S1: Parameter Values for  $G_p$  and  $W_{es}$  Numerical Predictions**

| Symbol                 | Definition                                          | Value                                   |
|------------------------|-----------------------------------------------------|-----------------------------------------|
| $c^{\text{Na}} _{t=0}$ | Initial Na+ concentration                           | 321.45 mol/m <sup>3</sup>               |
| $c^{\text{K}} _{t=0}$  | Initial K+ concentration                            | 13.39 mol/m <sup>3</sup>                |
| $c^{\text{Cl}} _{t=0}$ | Initial Cl- concentration                           | 334.84 mol/m <sup>3</sup>               |
| $a_{\text{Na}}$        | Na+ effective ion size                              | 4 Å                                     |
| $a_{\text{K}}$         | K+ effective ion size                               | 5 Å                                     |
| $a_{\text{Cl}}$        | Cl- effective ion size                              | 4 Å                                     |
| $D_w^{\text{Na}}$      | Na+ electrolyte diffusion coefficient in $\Omega_w$ | $1.33 \times 10^{-9}$ m <sup>2</sup> /s |
| $D_w^{\text{K}}$       | K+ electrolyte diffusion coefficient in $\Omega_w$  | $1.96 \times 10^{-9}$ m <sup>2</sup> /s |
| $D_w^{\text{Cl}}$      | Cl- electrolyte diffusion coefficient in $\Omega_w$ | $2.07 \times 10^{-9}$ m <sup>2</sup> /s |
| $\varepsilon_w$        | Electrolyte electrical permittivity                 | $7.083 \times 10^{-10}$ F/m             |
| $\varepsilon_m$        | Membrane electrical permittivity                    | $1.771 \times 10^{-11}$ F/m             |
| $F$                    | Faraday constant                                    | $9.6485 \times 10^4$ C/mol              |
| $C_s$                  | Stern layer capacitance                             | 1 pF                                    |
| $k_B$                  | Boltzmann constant                                  | $1.3806488 \times 10^{-23}$ J/K         |
| $T$                    | Temperature                                         | 300 K                                   |
| $\phi_e$               | Electrode potential                                 | 100-500 mV                              |
| $\phi_{ec}$            | Counter electrode potential                         | 0 mV                                    |
| $l_r$                  | Tether reservoir length                             | 400 nm                                  |
| $h_r$                  | Tether reservoir height                             | 4 nm                                    |
| $h_m$                  | Membrane thickness                                  | 4 nm                                    |
| $h_e$                  | Electrolyte height                                  | 60 nm                                   |

In Table S1, the concentrations match those used in the electrolyte solution of the engineered tethered membrane. The choice of effective ion size (i.e. solvated ionic radius) is based on the mobility measurements reported in (7, 8). The diffusion coefficients of the ions and electrical permittivities of water and biological membrane are provided in (6). The geometric parameters  $h_r$  and  $h_m$  are selected to match the experimentally measured results obtained from neutron-reflectometry measurements of similar engineered tethered membranes reported in (1).

**TABLE S2: Parameter Values for Current Predictions**

| Symbol                                                | Definition                                              | Value                                                          |                               |                               |
|-------------------------------------------------------|---------------------------------------------------------|----------------------------------------------------------------|-------------------------------|-------------------------------|
| $\gamma$                                              | Edge energy                                             | $1.8 \times 10^{-11} \text{ J/m}$                              |                               |                               |
| $\sigma$                                              | Surface tension                                         | $1 \times 10^{-3} \text{ J/m}^2$                               |                               |                               |
| $C$                                                   | Steric repulsion constant                               | $9.67 \times 10^{-15} \text{ J}^{1/4} \text{ m}$               |                               |                               |
| $D$                                                   | Radial diffusion coefficient                            | $1 \times 10^{-14} \text{ m}^2/\text{s}$                       |                               |                               |
| $\alpha$                                              | Creation rate coefficient                               | $1 \text{ Gs}^{-1} [10 \text{ Ms}^{-1} - 0.1 \text{ Ts}^{-1}]$ |                               |                               |
| $q$                                                   | $q = (r_m/r_*)^2$ with the symbols defined below Eq. 17 | $2.46 \pm 0.07$                                                |                               |                               |
| <b>DphPC Membrane</b>                                 |                                                         | <b>Tether Density:</b>                                         |                               |                               |
|                                                       |                                                         | <b>1%</b>                                                      | <b>10%</b>                    | <b>100%</b>                   |
| $G_0$                                                 | Initial membrane conductance                            | $1.67 \pm 0.3 \mu\text{S}$                                     | $0.91 \pm 0.04 \mu\text{S}$   | $0.43 \pm 0.03 \mu\text{S}$   |
| $C_m$                                                 | Membrane capacitance                                    | $10.5 \pm 0.8 \text{ nF}$                                      | $10.5 \pm 0.7 \text{ nF}$     | $11.0 \pm 0.2 \text{ nF}$     |
| $R_e$                                                 | Electrolyte resistance                                  | $3.5 \pm 2 \text{ k}\Omega$                                    | $3.5 \pm 2 \text{ k}\Omega$   | $5.0 \pm 3.0 \text{ k}\Omega$ |
| $C_{dl}$                                              | Total electrode double-layer capacitance                | $136.3 \pm 6 \text{ nF}$                                       | $136.3 \pm 8 \text{ nF}$      | $118.2 \pm 8 \text{ nF}$      |
| $V_{ep}$                                              | Characteristic voltage of electroporation               | $430 \pm 5 \text{ mV}$                                         | $430 \pm 5 \text{ mV}$        | $580 \pm 10 \text{ mV}$       |
| $N_o$                                                 | Equilibrium pore density $G_0/G_p(r_m)$                 | $1068 [120-15\text{k}]$                                        | $582 [90-10\text{k}]$         | $275 [42-43\text{k}]$         |
| $K_t$                                                 | Spring constant                                         | $0 \text{ N/m}$                                                | $2 \pm 1.5 \text{ mN/m}$      | $20 \pm 15 \text{ mN/m}$      |
| <b>DphPC Membrane (Reservoir Double-Layer Effect)</b> |                                                         | <b>Tether Density:</b>                                         |                               |                               |
|                                                       |                                                         | <b>1%</b>                                                      | <b>10%</b>                    |                               |
| $G_0$                                                 | Initial membrane conductance                            | $1.00 \pm 0.1 \mu\text{S}$                                     | $1.00 \pm 0.1 \mu\text{S}$    |                               |
| $C_m$                                                 | Membrane capacitance                                    | $14.6 \pm 0.1 \text{ nF}$                                      | $16.0 \pm 0.4 \text{ nF}$     |                               |
| $R_e$                                                 | Electrolyte resistance                                  | $1.0 \pm 0.5 \text{ k}\Omega$                                  | $1.0 \pm 0.5 \text{ k}\Omega$ |                               |
| $C_{dl}$                                              | Total electrode double-layer capacitance                | $65 \pm 3 \text{ nF}$                                          | $39 \pm 2 \text{ nF}$         |                               |
| $V_{ep}$                                              | Characteristic voltage of electroporation               | $366 \pm 6 \text{ mV}$                                         | $400 \pm 5 \text{ mV}$        |                               |
| $N_o$                                                 | Equilibrium pore density $G_0/G_p(r_m)$                 | $641 [100-2\text{k}]$                                          | $641 [100-50\text{k}]$        |                               |
| $K_t$                                                 | Spring constant                                         | $0 \text{ N/m}$                                                | $2 \pm 1.5 \text{ mN/m}$      |                               |

## S1 Impedance Measurement of Tethered Membrane

For a low voltage (i.e. below 50 mV) sinusoidal potential defined by  $V_s(t) = V_o \sin(2\pi f)$ , where  $f$  is the frequency of excitation and  $V_o$  is the magnitude of excitation, the impedance of the engineered tethered membrane is given by:

$$Z(f) = R_e + \frac{1}{G_o + j2\pi f C_m} + \frac{1}{j2\pi f C_{dl}} \quad (\text{S1})$$

with the parameters  $R_e, G_o, C_m, C_{dl}$  defined in Eq. 1. In Eq. S1,  $j$  denotes the complex number  $\sqrt{-1}$ . To test the quality of the formed membrane we utilize impedance measurements of the membrane and estimate the parameters in Eq. S1. The numerically predicted and measured impedance values are provided in Fig.S1 and Fig.S2. As seen, the predicted impedance is in excellent agreement with the experimental measured impedance and is consistent with a membrane containing negligible defects as discussed in the paper.

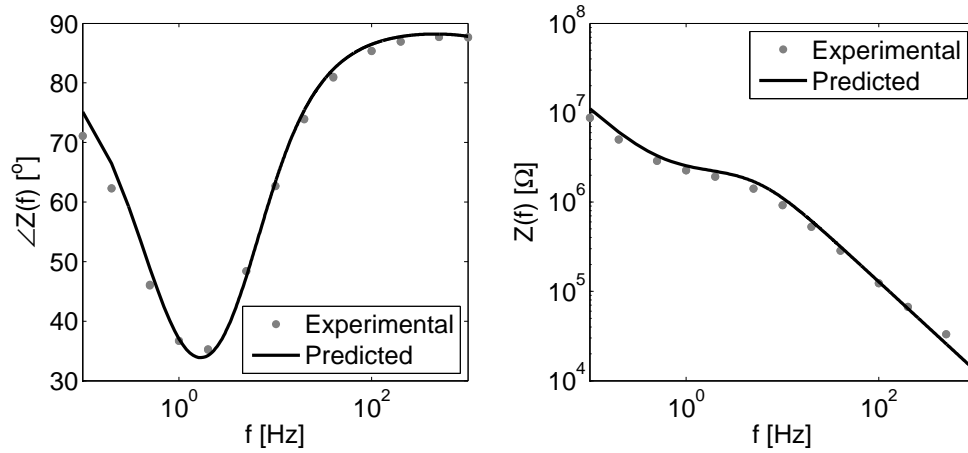

Figure S1: The measured and predicted impedance of the 10% tether density DphPC bilayer membrane. All predictions are computed using Eq. S1 with the parameters defined in Table S2 of the Supporting Material.

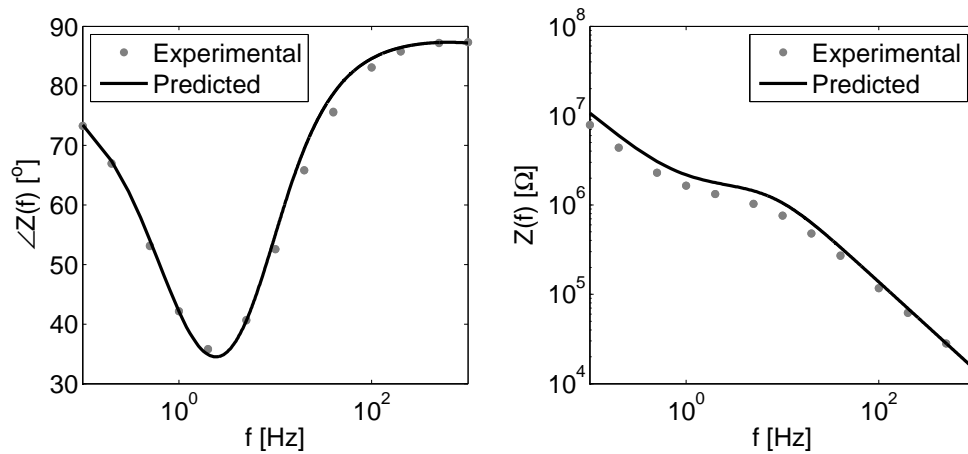

Figure S2: The measured and predicted impedance of the 1% tether density DphPC bilayer membrane. All predictions are computed using Eq. S1 with the parameters defined in Table S2.

## S2 Numerical Methods

The numerical estimate of  $I(t)$  is computed using Eq. 1 and 2 assuming there are a finite number of possible pore radii using the algorithm presented in (2, 3). The governing equations Eq. 5 with boundary conditions Eq. 8-11, are solved numerically with the com-

mercially available finite element solver COMSOL 4.3a (Comsol Multiphysics, Burlington, MA). To solve the GPNP and PNP models the COMSOL modules *Transport of Diluted Species* and *Electrostatics* are utilized; and to solve the EM model the modules *Nernst-Planck* and *Electrostatics* are utilized. The simulation domain is meshed with approximately 270,000 triangular elements constructed using an advancing front meshing algorithm. The GPNP and PNP are numerically solved using the *multifrontal massively parallel sparse direct solver* (4) with a variable-order variable-step-size backward differential formula (5). Eq. 12 is used to compute the pore conductance with the integration done in the region defined in Fig. 3. The conductance is computed for a finite number of equally spaced radii between 0.5-10 nm with a step-size of 0.25 nm. The steady-state conductance  $G_p$ , Eq. 12, is estimated when the percentage change in conductance between successive steps (i.e.  $|(G_p(t_{i+1}) - G_p(t_i))/G_p(t_i)|$ ) is less than 1%. The total force acting on the toroidal pore  $F(r)$ , Eq. 16, is computed using the results from the conductance computation. Substituting  $F(r)$  into Eq. 13, the total electrical energy required to form the pore  $W_{es}$  is computed.

## Supporting References

- [1] Heinrich, F., T. Ng, D. Vanderah, P. Shekhar, M. Mihailescu, H. Nanda, and M. Losche, 2009. A new lipid anchor for sparsely tethered bilayer lipid membranes. *Langmuir* 25:4219–4229.
- [2] Smith, K., J. Neu, and W. Krassowska, 2004. Model of creation and evolution of stable electropores for DNA delivery. *Biophysical Journal* 86:2813 – 2826.
- [3] Krassowska, W., and P. Filev, 2007. Modeling electroporation in a single cell. *Biophysical Journal* 92:404 – 417.
- [4] Amestoy, P., I. Duff, J. L'Excellent, and J. Koster, 2001. A fully asynchronous multifrontal solver using distributed dynamic scheduling. *SIAM Journal on Matrix Analysis and Applications* 23:15–41.
- [5] Brown, P., A. Hindmarsh, and L. Petzold, 1994. Using Krylov methods in the solution of large-scale differential-algebraic systems. *SIAM Journal on Scientific Computing* 15:1467–1488.
- [6] Hobbie, R., and B. Roth, 2007. Intermediate physics for medicine and biology. Springer.
- [7] Nightingale, E., 1959. Phenomenological theory of ion solvation. Effective radii of hydrated ions. *The Journal of Physical Chemistry* 63:1381–1387.
- [8] Israelachvili, J., 2011. Intermolecular and surface forces: revised third edition. Academic press.
